# Supplementary material for: Assessment of COVID-19 Incidence and the Ability to Synthesise Anti-SARS-CoV-2 Antibodies of Paediatric Patients with Primary Immunodeficiency
Source: MDPI journal article supplement (doi:10.3390/jcm10215111), 2021-10-30
Supplement: s1 [file s1]

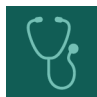

## Supplementary Materials

**Table S1.** Clinical characteristics of patients with PID with confirmed or suspected SARS-CoV-2 infection.

| Patient No | Sex | Age (years) | PID diagnoses                   | COVID-19 infection | Symptoms of COVID-19                                  | Antibody anti-SARS-CoV-2 production [AU/ml] | IgG [mg/dL] [norm] | Outcome  |
|------------|-----|-------------|---------------------------------|--------------------|-------------------------------------------------------|---------------------------------------------|--------------------|----------|
| 1          | M   | 2,5         | IgG deficiency                  | Yes                | Fever, cough, diarrhoea                               | +, 169                                      | 454,0 [540-1822]   | Recovery |
| 2          | F   | 12          | IgG deficiency                  | Yes                | Fever, sore throat                                    | +, 113                                      | 410,1 [553-1232]   | Recovery |
| 3          | M   | 1,5         | DiGeorge syndrome               | Yes                | Anxiety, bradycardia                                  | +, 27,7                                     | 189,8 [119-790]    | Recovery |
| 4          | F   | 9           | Silver-Russell syndrome         | Probably           | Fever, sore throat, cough, headache                   | +, 77,8                                     | 425,0 [553-1232]   | Recovery |
| 5          | M   | 9           | Nijmegen breakage syndrome      | Yes                | Upper respiratory tract infection, fever, rhinorrhoea | +, 26,1                                     | 827 [540-1822]     | Recovery |
| 6          | M   | 8           | IgG subclass deficiency         | Probably           | Fever, myalgia, rhinorrhoea                           | +, 247                                      | 1143,0 [553-1232]  | Recovery |
| 7          | F   | 4           | Kabuki syndrome, IgG deficiency | Yes                | Fever, diarrhoea, rhinorrhoea, earache                | +, 93                                       | 403,0 [553-1631]   | Recovery |
| 8          | M   | 7           | IgG subclass deficiency         | Probably           | Subfebrile state, cough                               | +, 85                                       | 1070,0 [540-1822]  | Recovery |
| 9          | F   | 7,5         | IgG subclass deficiency         | Probably           | Subfebrile state, rhinorrhoea                         | +, 25                                       | 751,0 [553-1631]   | Recovery |
| 10*        | M   | 6           | SCID (IL2RG)                    | Probably           | Fever, cough                                          | +, 338                                      | 649,1 [297-969]    | Recovery |
| 11         | F   | 7           | IgM, IgG subclass deficiency    | Probably           | Asymptomatic                                          | +, 50                                       | 1050,0 [553-1631]  | Recovery |

|    |   |      |                                                     |          |                                                                      |         |                   |                                                               |
|----|---|------|-----------------------------------------------------|----------|----------------------------------------------------------------------|---------|-------------------|---------------------------------------------------------------|
| 12 | M | 6    | IgG deficiency                                      | Yes      | Upper respiratory tract infection, elevated CRP 80 mg/l              | +, 120  | 356,6 [408-1120]  | Recovery                                                      |
| 13 | F | 3,5  | Nijmegen breakage syndrome                          | Probably | Rhinorrhoea                                                          | +, 25,7 | 117,2 [119-790]   | Recovery                                                      |
| 14 | M | 9    | IgG subclass deficiency                             | Probably | Fever for 5 days                                                     | +, 38   | 500,3 [468-1150]  | Recovery                                                      |
| 15 | F | 1,5  | IgG deficiency                                      | Probably | Diarrhoea                                                            | +, 148  | 457,0 [483-1226]  | Recovery                                                      |
| 16 | M | 12,5 | IgG subclass deficiency                             | Yes      | Mild infection symptoms, rhinorrhoea, cough                          | +, 144  | 1300,0 [518-1284] | Recovery                                                      |
| 17 | M | 16,5 | Rubinstein-Taybi syndrome, IgM, IgG, IgA deficiency | Yes      | Subfebrile state, rhinorrhoea, cough, thrombocytopenia, desaturation | -, 5,96 | <108,5 [518-1284] | Hospitalization<br>Required oxygen administration<br>Recovery |
| 18 | F | 4,5  | IgM deficiency                                      | Probably | Lack of data                                                         | +, 32,7 | 778,0 [553-1631]  | -                                                             |
| 19 | M | 3,5  | IgG subclass deficiency                             | Yes      | Asymptomatic                                                         | +, 219  | 456,0 [408-1120]  | -                                                             |
| 20 | F | 1,5  | IgG deficiency                                      | Yes      | Fever, encephalitis suspicion                                        | +, 447  | 448,0 [483-1126]  | Hospitalization, Recovery                                     |
| 21 | M | 8,5  | IgG subclass deficiency, trisomy 21                 | Probably | Subfebrile state                                                     | +, 65,6 | 485,2 [297-969]   | Recovery                                                      |
| 22 | F | 12,5 | CD3+, CD4+, CD8+ deficiency during diagnostics      | Yes      | Mild symptoms, cough                                                 | +, 192  | 1111,0 [553-1631] | Recovery                                                      |
| 23 | F | 1    | IgA, IgM, IgG                                       | Yes      | Subfebrile state                                                     | +, >800 | 461,4 [483-1226]  | Recovery                                                      |

|     |   |      |                                            |          |                                                                                             |          |                   |                        |
|-----|---|------|--------------------------------------------|----------|---------------------------------------------------------------------------------------------|----------|-------------------|------------------------|
|     |   |      | deficiency                                 |          |                                                                                             |          |                   |                        |
| 24  | M | 4,5  | IgG subclass deficiency                    | Yes      | Mild symptoms                                                                               | +, 151   | 655,0 [540-1882]  | Recovery               |
| 25  | F | 1    | IgG, IgA deficiency                        | Yes      | Fever, cough                                                                                | -, <1,85 | 440,0 [483-1226]  | Hospitalized, Recovery |
| 26  | M | 11   | IgG subclass deficiency                    | Probably | Asymptomatic /mild symptoms                                                                 | +, 42,5  | 819,0 [540-1823]  |                        |
| 27  | M | 11   | Ataxia-telangiectasia                      | Probably | Fever, rhinorrhoea, cough                                                                   | +, 47,2  | 802,0 [540-1822]  | Recovery               |
| 28  | M | 9,5  | IgG subclass deficiency                    | Yes      | Cough, dyspnea, pneumonia                                                                   | +, 136   | 668,0 [540-1822]  | Recovery               |
| 29  | M | 2    | IgG subclass deficiency                    | Probably | Fever                                                                                       | +, 139   | 380,0 [349-918]   | Recovery               |
| 30  | M | 7    | IgG subclass deficiency                    | Yes      | Sore throat                                                                                 | +, 136   | 775,0 [540-1822]  | Recovery               |
| 31  | M | 3    | IgG deficiency                             | Yes      | Cough, asthma exacerbation                                                                  | +, 213   | 536,0 [540-1822]  | Recovery               |
| 32  | M | 6,5  | Nijmegen breakage syndrome                 | Probably | Diarrhoea                                                                                   | +, 29,5  | 301,1 [408-1120]  | Recovery               |
| 33  | F | 8    | Congenital asplenia, lymphocyte deficiency | Yes      | Mild symptoms, subfebrile state, diarrhoea                                                  | +, 161   | 1296,1 [553-1631] | Recovery               |
| 34  | M | 4,5  | IgG subclass deficiency                    | Probably | Asymptomatic when close contact to infected parent; then bronchitis without SARS-CoV-2 test | +, 164   | 608,0 [553-1631]  | Recovery               |
| 35* | F | 15,5 | IgG subclass                               | Yes      | Fever, pneumonia                                                                            | +, 84,9  | 1187,0 [553-1631] | MIS-C Recovery         |

---

deficienc

y

---

10\* - patient with SCID after HSCT few years ago; data about immunoglobulin G level before substitution currently unavailable; 35\* - patient assigned to MIS-C/ PIMS-TS group

Abbreviations: COVID-19 – coronavirus disease; CVID – common variable immunodeficiency; F- female; IgA – immunoglobulin A; IgG – immunoglobulin G; IgM – immunoglobulin M; M - male; MIS-C – multisystem inflammatory syndrome in children; No – number; PID – primary immunodeficiency; SARS-CoV-2 – severe acute respiratory syndrome coronavirus 2; SCID – severe combined immunodeficiency; + means anti-SARS-CoV-2 IgG  $\geq 13$  AU/ml and was considered positive result; - means anti-SARS-CoV-2 IgG  $<13$  and was considered negative result
